# Supplementary material for: Prothrombotic factors do not increase the risk of recurrent ischemic events after cryptogenic stroke at young age: the FUTURE study
Source: Springer Nature journal article supplement (doi:10.1007/s11239-018-1631-4), 2018-02-26
Supplement: MOESM1 [file 15491616]

## ONLINE SUPPLEMENT

### **Prothrombotic factors do not increase the risk of recurrent ischemic events after cryptogenic stroke at young age The FUTURE Study**

M.M.I. Schellekens\* MD; M.E. van Alebeek\* MD; R.M. Arntz\* MD, PhD; N.E. Synhaeve†, MD, PhD; N.A.M.M. Maaijwee‡, MD, PhD; H. Schoonderwaldt MD, PhD, M.J. van der Vlugt§ MD, PhD; E.J. van Dijk\* MD, PhD; L.C.A. Rutten-Jacobs¶, PhD; F.H. de Leeuw\* MD, PhD

Corresponding author: Professor Frank-Erik de Leeuw

RadboudUMC, department of Neurology, PO Box 9101, 6500 HB Nijmegen, the Netherlands

T: +3124-3616600 F: +3124-3618837

FrankErik.deLeeuw@radboudumc.nl

\* Radboudumc, Donders Institute for Brain, Cognition and Behaviour, Center for Neuroscience, department of Neurology, PO Box 9101, 6500 HB Nijmegen, the Netherlands

† Department of Neurology, Elisabeth Tweesteden Hospital, PO Box 90151, 5000, LC Tilburg, the Netherlands

‡ Center for Neurology and Neurorehabilitation, Luzern State Hospital, Spitalstrasse 31, 6000, Luzern 16, Switzerland.

§ Radboudumc, department of Cardiology, PO Box 9101, 6500, HB Nijmegen, the Netherlands

¶ University of Cambridge, Department of Clinical Neurosciences, Cambridge, United Kingdom

## Supplemental Table

**Supplementary Table I** Distribution of prothrombotic factors and recent infections stratified by TOAST category.

|                              | Positive result/n <sub>investigated</sub> (%) |                      |                             |                       |                      |               |                 |               |
|------------------------------|-----------------------------------------------|----------------------|-----------------------------|-----------------------|----------------------|---------------|-----------------|---------------|
|                              | Total                                         | Large artery disease | Likely large artery disease | Cardio-embolic stroke | Small vessel disease | Other defined | Multiple causes | Unknown       |
| <b>Prothrombotic factors</b> |                                               |                      |                             |                       |                      |               |                 |               |
| Protein C activity           | 7/255 (2.7)                                   | 1/10 (10.0)          | 0/41 (0)                    | 1/25 (4.0)            | 1/32 (3.1)           | 1/39 (2.6)    | 1/8 (12.5)      | 2/100 (2.0)   |
| Free protein S antigen       | 6/252 (2.4)                                   | 0/10 (0)             | 1/41 (2.4)                  | 0/26 (0)              | 0/32 (0)             | 1/37 (2.7)    | 1/7 (14.3)      | 3/99 (3.0)    |
| Antithrombin III activity    | 15/262 (5.7)                                  | 1/10 (10.0)          | 3/42 (7.1)                  | 2/34 (5.9)            | 2/32 (6.3)           | 4/37 (10.8)   | 0/8 (0)         | 3/99 (3.0)    |
| Factor V mutation            | 10/207 (4.8)                                  | 0/7 (0)              | 0/30 (0)                    | 0/28 (0)              | 2/29 (6.9)           | 6/34 (17.6)   | 0/3 (0)         | 2/76 (2.6)    |
| Factor II mutation           | 3/189 (1.6)                                   | 0/6 (0)              | 0/29 (0)                    | 1/27 (3.7)            | 1/24 (4.2)           | 0/29 (0)      | 0/3 (0)         | 1/71 (1.4)    |
| Factor VIII activity         | 10/157 (6.4)                                  | 0/4 (0)              | 1/29 (3.4)                  | 2/23 (8.7)            | 3/19 (15.8)          | 1/26 (3.8)    | 0/4 (0)         | 3/52 (5.8)    |
| Lupus anticoagulant          | 7/262 (2.7)                                   | 0/10 (0)             | 1/40 (2.5)                  | 1/32 (3.1)            | 0/32 (0)             | 3/39 (7.7)    | 1/9 (11.1)      | 1/100 (1.0)   |
| Anticardiolipin IgG          | 6/249 (2.4)                                   | 0/10 (0)             | 1/36 (2.8)                  | 0/34 (0)              | 1/30 (3.3)           | 0/39 (0)      | 1/6 (16.7)      | 3/94 (3.2)    |
| Anticardiolipin IgM          | 7/248 (2.8)                                   | 0/10 (0)             | 1/36 (2.8)                  | 1/34 (2.9)            | 0/30 (0)             | 0/39 (0)      | 1/6 (16.7)      | 4/93 (4.3)    |
| Any prothrombotic factor     | 56/294 (19.0)                                 | 1/10 (10.0)          | 6/45 (13.3)                 | 7/40 (17.5)           | 8/35 (22.9)          | 14/46 (30.4)  | 3/9 (33.3)      | 17/109 (15.6) |
| Any aPL                      | 17/284 (6.0)                                  | 0/10 (0)             | 3/40 (7.0)                  | 2/37 (5.4)            | 1/34 (2.9)           | 3/44 (6.8)    | 2/9 (22.2)      | 6/107 (5.6)   |
| <b>Infectious pathogens</b>  |                                               |                      |                             |                       |                      |               |                 |               |
| Borrelia IgG                 | 3/239 (1.3)                                   | 0/12 (0)             | 1/36 (2.8)                  | 0/28 (0)              | 1/30 (3.3)           | 0/42 (0)      | 0/4 (0)         | 1/87 (1.1)    |
| Borrelia IgM                 | 5/239 (2.1)                                   | 0/12 (0)             | 1/36 (2.8)                  | 0/28 (0)              | 1/30 (3.3)           | 1/42 (2.4)    | 0/4 (0)         | 2/87 (2.3)    |
| Syphilis                     | 1/249 (0.4)                                   | 0/13 (0)             | 0/38 (0)                    | 0/30 (0)              | 0/30 (0)             | 0/41 (0)      | 0/6 (0)         | 1/91 (1.1)    |

Abbreviations: TOAST, Trial of ORG 10172 in Acute Stroke Treatment; aPL, antiphospholipid antibody.
